# Supplementary material for: In search for geroprotectors: in silico screening and in vitro validation of signalome-level mimetics of young healthy state
Source: publisher site journal article supplement (doi:10.18632/aging.101047), 2016-09-24
Supplement: Supplementary file 1 [file aging-v8i9-101047-supplementary-material-SD2.xlsx]

## Sheet: Sheet1
Name	HA-1004	Staurosporine	Myricetin	EGCG	NAC	PD-98059	Ursolic Acid	Fasudil hydrochloride
pert_id	BRD-K05434375	BRD-K17953061	BRD-K43149758	BRD-K55591206	BRD-K59058747	BRD-K62810658	BRD-K68185022	BRD-K76617868
C0003811	0.653209	0.112608	0.343896	0.402229	0.391677	0.360188	0.934708	0.683199
C0004623	0	0	0	0	0	0	0	0
C0004936	0.949162	0.87148	0.884932	0.886923	0.68439	0.899251	0.93814	0.907956
C0004998	0	0	0	0	0	0	0	0
C0005395	0	0	0	0	0	0	0	0
C0005818	0.604631	0.434898	0.459318	0.521459	0.621936	0.432623	0.24978	0.958799
C0006145	0.38302	0.452899	0.346751	0.187593	0.619827	0.24367	0.751946	0.272742
C0007114	0	0	0	0	0	0	0	0
C0012746	0.258266	0.238658	0.154353	0.200369	0.124721	0.353872	0.194618	0.270285
C0014130	0.262006	0.333224	0.274028	0.193625	0.0945261	0.231299	0.0150679	0.126239
C0015397	0.590367	0.955676	0.544489	0.419829	0.926741	0.601368	0.248538	0.559734
C0016977	0	0	0	0	0	0	0	0
C0017178	1	1	1	1	1	1	1	1
C0018799	0.852127	0.922388	0.913847	0.651136	0.852066	0.633149	0.946297	0.862576
C0018801	0.610358	0.146328	0.348922	0.154329	0.000228952	0.232492	0.00542332	0.130074
C0021051	0.016862	0.000894094	0.108703	0.036842	0.0011216	0.0522805	0.00741879	0.00308695
C0021053	0.798871	0.862142	0.788117	0.752301	0.985416	0.809427	0.388526	0.954754
C0021502	0.28812	0.114655	0.0149657	0.167357	0.0957078	0.307101	0.00111962	0.292939
C0022408	0.43303	0.771518	0.697283	0.371738	0.85784	0.159049	0.9879	0.740593
C0022658	0.121914	0.0305798	0.433034	0.365061	0.000363147	0.629206	0.0265147	0.135474
C0023510	0.502273	0.585025	0.358561	0.517859	0.343275	0.510065	0.99675	0.933656
C0026848	0.864276	0.869841	0.673977	0.531558	0.749927	0.923452	0.901601	0.879084
C0027651	0.427865	0.23761	0.560474	0.363228	0.551051	0.132006	0.252629	0.762306
C0027765	1	1	1	1	1	1	1	1
C0027868	0.29405	0.565366	0.215066	0.258014	0.636111	0.22893	0.97114	0.0319189
C0030517	0.00136018	7.35e-05	9e-05	0.00032355	1.26e-05	0.000190403	4.3e-05	0.000838728
C0032226	0.466287	0.22767	0.152781	0.0830904	0.18386	0.0629056	0.16409	0.00175796
C0034139	0	0	0	0	0	0	0	0
C0035243	0.548103	0.546915	0.763652	0.519333	0.8431	0.109392	0.177408	0.464521
C0037089	1	1	1	1	1	1	1	1
C0037317	0	0	0	0	0	0	0	0
C0040128	0	0	0	0	0	0	0	0
C0042075	0.740585	0.874077	0.562477	0.792524	0.988412	0.691281	0.996464	0.912251
C0042373	0.888611	0.888818	0.800117	0.825542	0.76879	0.534812	0.951773	0.963748
C0042790	0.374069	0.636675	0.221714	0.211836	0.138394	0.349248	0.194305	0.239857
C0162819	0.530954	0.377609	0.5865	0.387053	0.0648421	0.566854	0.146677	0.168297
C0178298	0.905549	0.780994	0.872028	0.829419	0.988767	0.847785	0.858607	0.866695
C0206277	0.383517	0.222761	0.266329	0.517906	0.408061	0.183547	0.154713	0.0194147
C0221016	0	0	0	0	0	0	0	0
C0236988	0.472535	0.472535	0.472535	0.497803	0.472535	0.472977	0.472535	0.472535
C0260662	0.161099	0.0777677	0.0915885	0.124187	0.0765639	0.344017	0.079286	0.111058
C0263660	0.851656	0.857203	0.741752	0.514569	0.766331	0.932162	0.896901	0.959531
C0265122	0	0	0	0	0	0	0	0
C0267792	0.613162	0.628451	0.667907	0.71952	0.791023	0.71172	0.987284	0.872556
C0268657	0.0110802	0.0116462	0.0686872	0.0149406	0.0129165	0.0134051	0.0165446	0.018619
C0342257	0	0	0	0	0	0	0	0
C0403608	0.00992897	0.0107255	0.0368687	0.116452	0.0112928	0.00942095	0.0418701	0.0106695
C0430681	0	0	0	0	0	0	0	0
C0451641	0	0	0	0	0	0	0	0
C0549567	0.297021	0.320598	0.305031	0.253503	0.0509692	0.232781	0.438635	0.355523
C0740265	0.274158	0.0537316	0.0324476	0.17332	0.000193007	0.0827862	0.00345359	0.22265
C0851352	0.0687942	0.0836986	0.0559776	0.0823483	3.15e-06	0.0847371	0.136794	0.121711
C0851353	0.789123	0.931257	0.792664	0.739012	0.83366	0.488965	0.980883	0.944779
C0851354	0.390786	0.608152	0.40689	0.275044	0.338763	0.55295	0.91711	0.109894
C0851355	0.816314	0.757644	0.948984	0.375973	0.950234	0.564685	0.990068	0.768962
C0851358	0.81403	0.887185	0.926265	0.771947	0.999171	0.951135	0.909357	0.974752
C0851362	1	1	1	1	1	1	1	1
C0851363	0	0	0	0	0	0	0	0
C0851364	0.178109	0.193635	0.0426658	0.0954769	0.23555	0.185966	0.0358287	0.315045
C0851366	0.602517	0.858386	0.606067	0.530125	0.874472	0.128008	0.850082	0.486394
C0851368	0.576997	0.481311	0.598645	0.576071	0.495069	0.415886	0.985957	0.460517
C0851371	0.774806	0.777861	0.813936	0.499067	0.106595	0.819925	0.983098	0.863896
C0851377	0.365255	0.316947	0.602891	0.24926	0.00325656	0.346018	0.0277802	0.205271
C0851381	0	0	0	0	0	0	0	0
C0851382	0.489703	0.474108	0.613149	0.462786	0.717115	0.134487	0.977056	0.180925
C0851389	0.721443	0.89321	0.769874	0.475846	0.835403	0.579593	0.92707	0.774289
C0851394	0	0	0	0	0	0	0	0
C0851396	0.0024441	2.25e-05	0.000124711	0.0207037	2.1e-07	0.000303188	2.12e-07	0.101511
C0851397	0.319629	0.502366	0.242247	0.299043	0.646075	0.289521	0.00547959	0.127531
C0851398	4.43e-30	1.15e-28	3.81e-30	1.52e-32	1.12e-32	3.08e-31	5.35e-29	5.43e-29
C0851399	0.267024	0.30364	0.299985	0.294686	0.26016	0.292824	0.315541	0.236395
C0851400	0.27358	0.419416	0.160206	0.125145	0.0048702	0.207403	0.758486	0.165661
C0851405	0	0	0	0	0	0	0	0
C0851406	0.643073	0.623335	0.48803	0.404518	0.0865267	0.688865	0.98909	0.442615
C0851408	0.263946	0.658467	0.278888	0.270487	0.11968	0.396907	0.204242	0.159875
C0851409	0	0	0	0	0	0	0	0
C0851410	0.470698	0.470698	0.470698	0.489423	0.496942	0.470698	0.470698	0.470698
C0851412	0	0	0	0	0	0	0	0
C0851413	0.494552	0.313215	0.51441	0.266447	0.0125103	0.212815	0.104045	0.0480279
C0851414	0.543183	0.467695	0.584038	0.522185	0.293431	0.620622	0.974633	0.0403885
C0851419	0.547404	0.0320277	0.558385	0.515354	0.1224	0.543855	0.974745	0.687564
C0851420	0	0	0	0	0	0	0	0
C0851421	0.2858	0.0185343	0.0683454	0.0945804	9.32e-05	0.00289582	0.00335767	0.000162083
C0851422	1	1	1	1	1	1	1	1
C0851423	0	0	0	0	0	0	0	0
C0851426	0.3986	0.117533	0.425958	0.409978	0.0926085	0.315732	0.998754	0.441529
C0851427	0	0	0	0	0	0	0	0
C0851428	0.601306	0.479595	0.530263	0.377588	0.988633	0.367453	0.149499	0.61896
C0851429	0.356618	0.276236	0.299216	0.211171	0.754678	0.111804	0.00365492	0.0319305
C0851430	0.257539	0.413759	0.273222	0.153122	0.00992102	0.399197	0.00334122	0.0311059
C0851432	0	0	0	0	0	0	0	0
C0851439	0.701112	0.6501	0.773246	0.555991	0.969655	0.240615	0.253028	0.896598
C0851440	0	0	0	0	0	0	0	0
C0851441	0	0	0	0	0	0	0	0
C0851443	0.435747	0.435747	0.435747	0.435747	0.513028	0.435747	0.435747	0.435747
C0851444	0.759651	0.866134	0.728535	0.770814	0.627798	0.716912	0.29178	0.843505
C0851445	0	0	0	0	0	0	0	0
C0851446	0	0	0	0	0	0	0	0
C0851451	0	0	0	0	0	0	0	0
C0851452	0.356594	0.0818089	0.33388	0.196422	0.746467	0.133261	0.242103	0.465581
C0851454	0	0	0	0	0	0	0	0
C0851457	0.724943	0.287702	0.64446	0.380275	0.0728007	0.392068	0.84771	0.292044
C0851458	0.00478224	0.00472351	0.00652236	0.00520494	0.0956218	0.00754359	0.00510003	0.00759585
C0851459	0.548874	0.697313	0.469738	0.43441	0.615835	0.527273	0.147881	0.157475
C0851460	0.836944	0.605309	0.787507	0.446897	0.914491	0.488274	0.722529	0.252355
C0851464	9.11e-06	1.53e-06	1.08e-05	0.00012235	4.08e-08	0.00118961	7.47e-09	2.68e-08
C0851467	0.212934	0.0584006	0.150827	0.0223537	0.000156533	0.0738244	0.167788	0.00482149
C0851469	0.613306	0.666832	0.487147	0.441921	0.0080642	0.486237	0.243722	0.584172
C0851471	0	0	0	0	0	0	0	0
C0851473	0.661064	0.599629	0.594431	0.467162	0.980101	0.563818	0.250411	0.795098
C0851475	0	0	0	0	0	0	0	0
C0851476	0.246334	0.226453	0.166876	0.481224	0.239848	0.377741	0.180271	0.132256
C0851477	0	0	0	0	0	0	0	0
C0851479	0.542868	0.485694	0.532243	0.604959	0.684298	0.47053	0.999659	0.937135
C0851480	0.70155	0.946041	0.956341	0.596734	0.962523	0.738816	0.989915	0.596429
C0851483	0	0	0	0	0	0	0	0
C0851485	0.277072	0.314327	0.208951	0.175531	0.0249043	0.087181	0.189767	0.234709
C0851491	0.531064	0.594179	0.456547	0.332787	0.089734	0.288791	0.748344	0.00507128
C0851494	0.0730651	0.00907974	0.0453093	0.0355983	1.53e-06	0.158321	2.99e-05	7.26e-05
C0851498	0	0	0	0	0	0	0	0
C0851499	4.4e-09	0.031281	0.000425538	0.000117092	3.6e-10	3.47e-08	3.99e-05	8.68e-09
C0851500	0.0959739	0.179448	0.0215091	0.100422	0.554789	0.134398	0.00638132	0.000796177
C0851503	0	0	0	0	0	0	0	0
C0851508	0.59891	0.439237	0.575757	0.511437	0.776259	0.810699	0.249305	0.558672
C0851509	0	0	0	0	0	0	0	0
C0851510	0	0	0	0	0	0	0	0
C0851512	0.458074	0.458074	0.458074	0.458074	0.458074	0.458074	0.458074	0.458074
C0851516	0	0	0	0	0	0	0	0
C0851526	0.196947	0.122914	0.377911	0.00463517	0.000172684	0.035171	0.00414855	0.0240222
C0851527	0	0	0	0	0	0	0	0
C0851532	0.588133	0.401388	0.354113	0.304309	0.057105	0.42332	0.978513	0.600042
C0851534	0.0715663	0.0989706	0.00397063	0.0346174	1.3e-06	0.0268537	2.16e-05	0.000325833
C0851535	0	0	0	0	0	0	0	0
C0851536	0.479797	0.219484	0.423402	0.191394	0.0105902	0.146962	0.182981	0.198346
C0851537	0.0598429	0.00996084	0.01286	0.070108	0.191989	0.0139044	0.0370734	0.00381097
C0851539	0.375632	0.331626	0.255292	0.393642	0.0459598	0.257341	0.243664	0.239317
C0851545	0	0	0	0	0	0	0	0
C0851546	0.0490367	0.0691127	0.102229	0.0504619	0.655172	0.0226532	0.218525	0.00171965
C0851547	0.708662	0.838697	0.632898	0.688014	0.865224	0.635712	0.663247	0.664299
C0851553	0.000657192	0.00399069	5.39e-06	4.02e-07	3.88e-06	4.65e-05	2.21e-07	0.00587429
C0851554	0.54497	0.395404	0.269339	0.488402	0.00113743	0.249234	0.00963635	0.154507
C0851555	0	0	0	0	0	0	0	0
C0851558	0.380451	0.508123	0.380987	0.223105	0.0415692	0.523684	0.751319	0.12717
C0851560	0.434297	0.434297	0.434297	0.434297	0.635075	0.434297	0.543883	0.434297
C0851563	0.507565	0.798142	0.630943	0.466961	0.965463	0.245445	0.997715	0.505602
C0851566	0	0	0	0	0	0	0	0
C0851572	0.213416	0.385857	0.569916	0.180581	0.797536	0.0676692	0.11691	0.218852
C0851573	0.407972	0.0861505	0.526375	0.136994	0.702324	0.347171	0.00355071	0.203654
C0851574	0.384771	0.367634	0.536223	0.408658	0.0239701	0.351019	0.408543	0.408289
C0851575	0.260883	0.18191	0.32067	0.29862	0.785419	0.352171	0.26724	0.266391
C0851576	0.142422	0.413259	0.5245	0.408621	0.0214095	0.340737	0.0056426	0.343723
C0851577	0	0	0	0	0	0	0	0
C0851578	0.873164	0.841551	0.926041	0.739896	0.839732	0.81286	0.847215	0.789444
C0851579	0.000858829	0.000911445	3.11e-05	8.93e-08	4.31e-09	0.00184445	2.49e-09	3.58e-06
C0851581	0	0	0	0	0	0	0	0
C0851843	0	0	0	0	0	0	0	0
C0852322	0.448537	0.448537	0.448537	0.448537	0.448537	0.448537	0.448537	0.448537
C0854416	0	0	0	0	0	0	0	0
C0858346	0.394735	0.510709	0.204279	0.373951	0.0769263	0.304202	0.6815	0.169141
C0876965	0	0	0	0	0	0	0	0
C0877688	0.303677	0.103719	0.312614	0.477178	0.067609	0.0498576	0.25039	0.131482
C0947733	0.795534	0.57148	0.772946	0.531675	0.641348	0.765216	0.25	0.999331
C0947737	0.573879	0.905118	0.566697	0.438773	0.196575	0.394783	0.798046	0.473269
C0947741	0	0	0	0	0	0	0	0
C0947743	0.0340962	0.010346	0.0618113	0.0636192	0.000119396	0.0793778	0.0231827	0.259344
C0947747	0.584366	0.640227	0.438264	0.767077	0.246969	0.649211	0.998141	0.835419
C0947750	0	0	0	0	0	0	0	0
C0947751	0	0	0	0	0	0	0	0
C0947755	0.381629	0.178861	0.183724	0.240836	0.0288744	0.299153	0.215946	0.0490569
C0947758	0.386762	0.327139	0.476982	0.254103	0.732077	0.100395	0.17086	0.534275
C0947759	0.00549498	0.271845	0.000765572	0.0884126	2.41e-09	0.000148807	0.000751525	2.01e-08
C0947760	0.573992	0.543497	0.63414	0.463238	0.000153955	0.295266	0.060804	0.00155165
C0947764	0.0311683	0.0119739	0.0630784	0.0971058	0.276062	0.0122798	0.000612819	0.00159393
C0947765	0.0372641	0.238713	0.122679	0.36037	0.0699905	0.0370824	0.0737555	0.0463441
C0947766	0	0	0	0	0	0	0	0
C0947767	0	0	0	0	0	0	0	0
C0947768	1	1	1	1	1	1	1	1
C0947771	0	0	0	0	0	0	0	0
C0947773	0.312768	0.488885	0.583332	0.242958	0.098167	0.292575	0.20554	0.226345
C0947774	0	0	0	0	0	0	0	0
C0947777	0.347803	0.464802	0.199693	0.203431	0.0352249	0.0870392	0.000719919	0.00319543
C0947779	0	0	0	0	0	0	0	0
C0947780	0.54718	0.770804	0.513737	0.343054	0.935558	0.515035	0.966195	0.365352
C0947781	0	0	0	0	0	0	0	0
C0948987	0.485612	0.485612	0.487471	0.485612	0.487894	0.485612	0.498056	0.496549
C0948998	0.391133	0.4195	0.42784	0.212854	0.118738	0.108036	0.000483831	0.00098898
C0948999	0.634869	0.712697	0.477994	0.372706	0.495524	0.591675	0.995107	0.248196
C0949000	0.686143	0.592528	0.712446	0.547274	0.733405	0.300339	0.9269	0.824819
C0949002	0	0	0	0	0	0	0	0
C0949003	0.298291	0.818476	0.254689	0.537421	0.0196047	0.628808	0.233103	0.157761
C1112108	1	1	1	1	1	1	1	1
C1112113	0.511848	0.497436	0.508408	0.267219	0.175504	0.254216	0.2394	0.954537
C1112722	0.493514	0.493514	0.493514	0.493514	0.493514	0.493514	0.493514	0.493514
C1261322	0.779456	0.671807	0.728098	0.801907	0.861146	0.790732	0.751321	0.831159
C1328269	0.410428	0.186313	0.0657082	0.176478	0.565217	0.213646	0.0669606	0.206877
C1510475	0	0	0	0	0	0	0	0
C1536063	0	0	0	0	0	0	0	0
C1869106	0	0	0	0	0	0	0	0
C1956346	0.761715	0.966493	0.502324	0.599488	0.496591	0.660936	0.97236	0.336056
C2609234	0	0	0	0	0	0	0	0
C2748389	0.475281	0.297988	0.387577	0.419315	0.0795105	0.341055	0.26439	0.172668
C3241958	0.395837	0.381586	0.387874	0.340246	0.230693	0.420964	0.353566	0.378413
C3266954	0.550857	0.418373	0.699519	0.441876	0.99643	0.052556	0.250008	0.856429
C3266955	0.299914	0.612401	0.617763	0.476899	0.608633	0.548898	0.249974	0.6484
C3714514	0.64203	0.605364	0.65216	0.577961	0.963728	0.476453	0.249992	0.81113
